# Supplementary material
Source: publisher site journal article supplement (https://www.dovepress.com/get_supplementary_file.php?f=319255.docx)
Supplement: Supplementary file 1 [file get_supplementary_file.php]

Table S1: Variables of Box-Behnken design for the preparation of DAC-loaded BILS

| **Factors** | **Level used, actual (coded)** | | |
| --- | --- | --- | --- |
| **Independent variables** | Low (-1) | medium (0) | High (+1) |
| A: ratio of PL:SDC | 3:1 | 5:1 | 7:1 |
| B: Cholesterol amount (mg) | 0 | 15 | 30 |
| C: Sonication time (min) | 5 | 10 | 30 |
|  | **Constraints** | | |
| **Dependent variables** | Low | High | Target |
| Y1 = Vesicles size (nm) | 290 | 480 | Minimum |
| Y2 = Entrapment efficiency (%) | 85 | 97 | Maximum |
| Y3 = % Drug release | 33 | 47 | Maximum |

Table S2: Summary of regression analysis for responses Y1, Y2 and Y3 for fitting data to different models and their polynomial equation

| Model | | R2 | Adjusted R2 | Predicted R2 | Adequate Precision | SD | %CV |
| --- | --- | --- | --- | --- | --- | --- | --- |
| Response (Y1) | |  |  |  |  |  |  |
| Linear | | 0.5478 | 0.4245 | 0.2111 |  | - | - |
| 2F1 | | 0.5531 | 0.2180 | -0.6255 |  | - | - |
| Quadratic | | 0.9939 | 0.9830 | 0.9185 | 27.18 | 8.41 | 2.24% |
| Response (Y2) | |  |  |  |  |  |  |
| Linear | | 0.4248 | 0.2679 | 0.0064 |  |  |  |
| 2F1 | | 0.4708 | 0.0740 | -0.8165 |  |  |  |
| Quadratic | | 0.9826 | 0.9512 | 0.8744 | 16.7 | 0.91 | 0.99% |
| Response (Y3) | |  |  |  |  |  |  |
| Linear | | 0.8987 | 0.8711 | 0.8145 | 18.26 | 1.38 | 3.52% |
| 2F1 | | 0.9411 | 0.8970 | 0.8185 |  |  |  |
| Quadratic | | 0.9774 | 0.9367 | 0.8159 |  |  |  |
|  | Y1 = +316.67 + 41.62A – 6.63B – 47C + 8.75AB – 50AC – 50BC + 77.79A2 + 34.29B2 – 1.46C2 | | | | | | |
|  | Y2 = +96.33 + 2.75A + 2.25B +0.25C +0.5 AB – 0.5AC – 1.5 BC – 5.6 A2 – 1.17B2 – 1.17C2 | | | | | | |
|  | Y3= +39.20 -2.75A – 3.75B + 1.25C | | | | | | |

Y1: Particle size (nm); Y2: Entrapment efficiency (%); Y3: Drug release (%); R2: Coefficient of correlation; SD: Standard deviation; CV: Coefficient of variation.

Table S3: Composition, actual and predicted responses of the optimal DAC-loaded BILS formulation

| **Factor** | **Optimal value** | | **Response**  **Variable** | **Actual**  **value** | **Predicted value** | % **Prediction errora** |
| --- | --- | --- | --- | --- | --- | --- |
| A:PL: SDC | 5 | | Vesicle size  (nm) | 285 | 290 | - 1.75 |
| B: CH amount (mg) | | 4 | EE% | 93 | 94 | - 1.07 |
| C: Sonication time  (min) | 30 | | Release % | 45 | 43 | 4.44 |

aCalculated as [Actual-predicted/Acctual] *100.


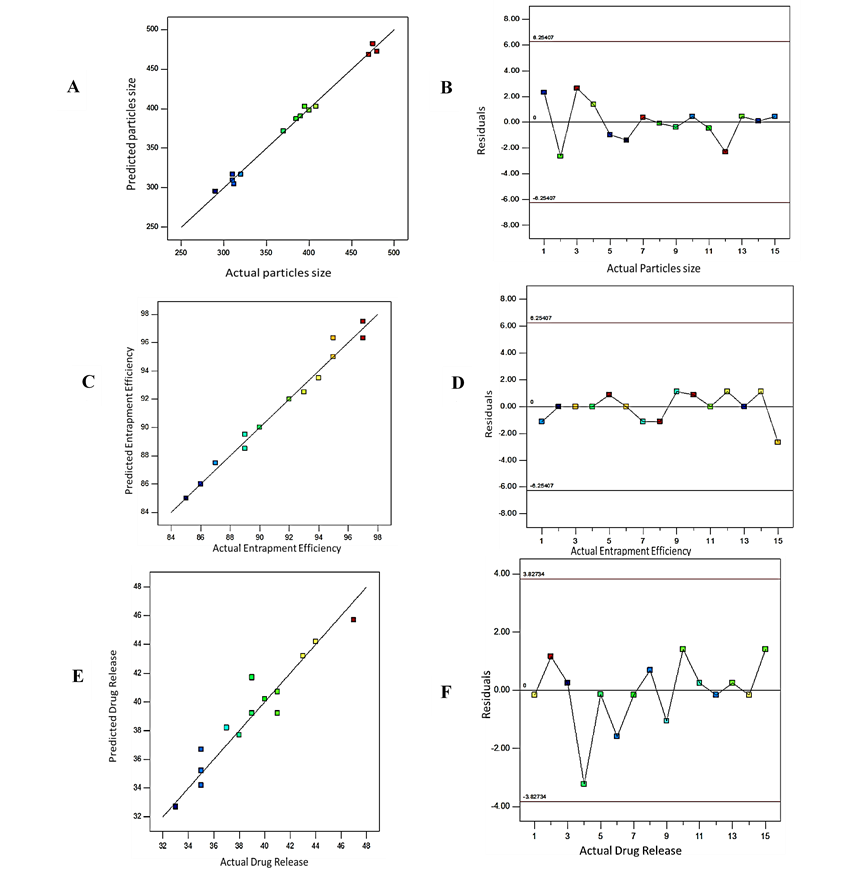
Figure S1: Linear correlation plots (A, C, E) between actual and predicted values and the corresponding residual plots (B, D, F) for various responses


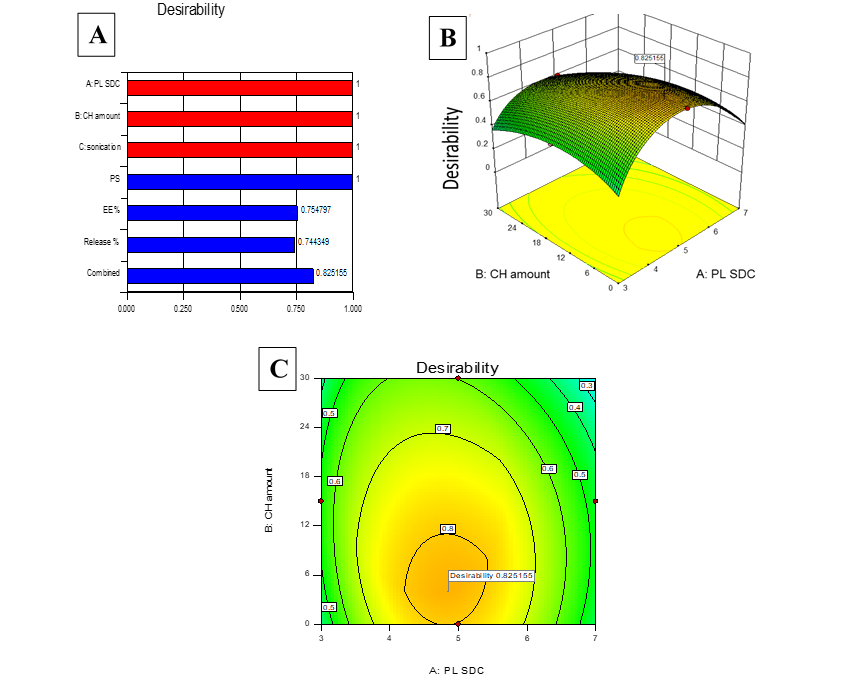


Figure S2: Desirability curve of optimized DAC-loaded BILS formulation; (A) Desirability bar graph, (B) 3D- desirability graph and (C) Contour desirability graph


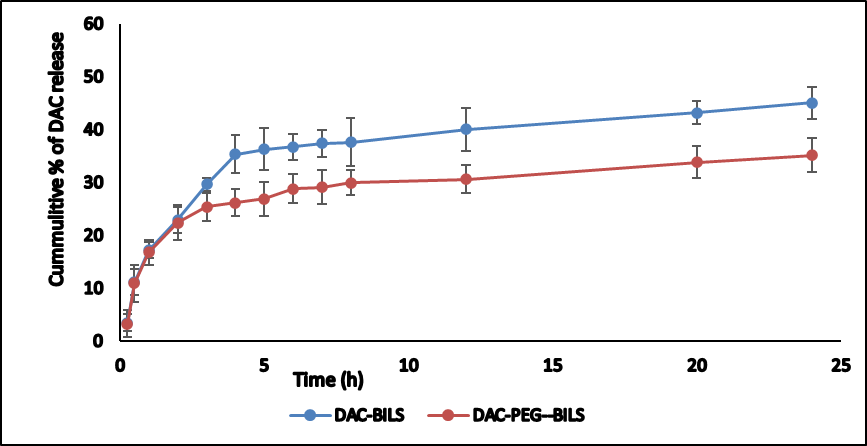


Figure S3: Drug release profiles of DAC from un-PEG-BILS and PEG-BILS in the release medium (phosphate buffer saline, pH 6.8 containing 0.75% Brij 35 at 37°C)


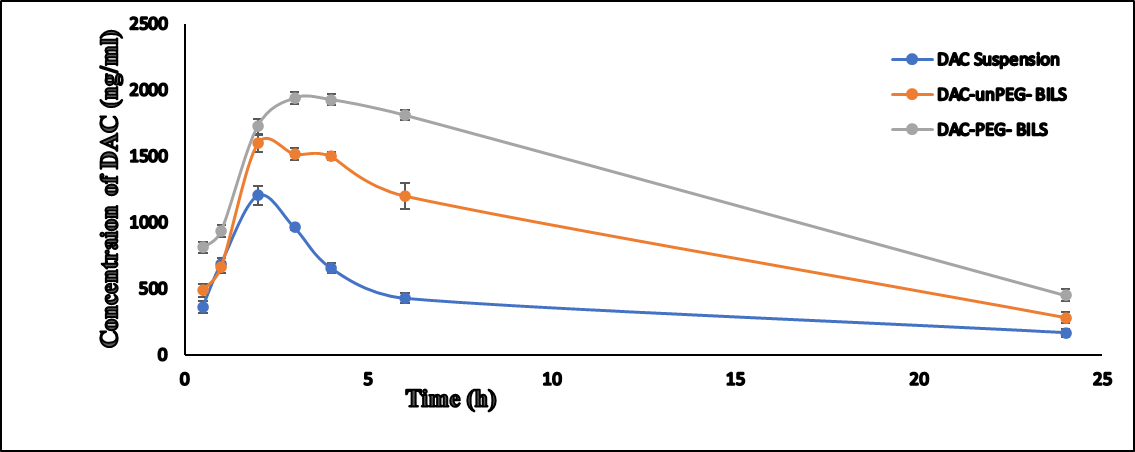


Figure S4: Mean liver concentration-time curves of DAC in rats after Oral administration of DAC Suspension, DAC-unPEG-BILS and DAC-PEG-BILS at a dose equivalent to 60 mg/kg of DAC (n=6)
